# Supplementary material for: Controllable fabrication of well-shaped PMBA@CsPbBr3 nanoparticles for highly sensitive detection of HCl and HBr
Source: Royal Society of Chemistry journal article supplement (doi:10.1039/d3cc05966a), 2024-01-01
Supplement: d3cc05966a1.pdf [file d3cc05966a1.pdf]

Electronic Supplementary Information

**Controllable fabrication of well-shaped PMBA@CsPbBr<sub>3</sub>  
nanoparticles for highly sensitive HCl and HBr detection**

Ying Zhou,<sup>‡</sup> Zaozhen He,<sup>‡</sup> Chunyu Zhao, Chengyu Shi, and Aizhao Pan\*

School of Chemistry, Xi'an Jiaotong University, Xianning West Road, 28, Xi'an,  
710049, China

<sup>‡</sup>These authors contributed equally.

\*E-mail: panaizhao2017032@xjtu.edu.cn.

## Experimental Section

### Materials

N, N'-methylenebis(acrylamide) (MBA, 99.0%, AR grade), Caesium carbonate ( $\text{Cs}_2\text{CO}_3$ , 99.0%, AR grade), Lead (II) bromide ( $\text{PbBr}_2$ , 99.0%, AR grade), toluene (99.5%), N, N'-dimethyl formamide (DMF, 99.9%, AR grade), azobisisobutyronitrile (AIBN, 98%), 4-cyano-4-(thiobenzoyl)pentanoic acid (CPADB). All the reagents are directly used without further purification.

### Synthesis of PMBA@CsPbBr<sub>3</sub> NPs

Firstly, toluene (10 mL) and DMF (0.15 mL) were mixed in a reaction flask with MBA (80 mg),  $\text{PbBr}_2$  (7.0 mg) and  $\text{Cs}_2\text{CO}_3$  (2.9 mg). The flask was sealed and stirred (600 rpm) at room temperature for 72 hours. After that, a mixture of initiator AIBN (2 mg) and chain transfer agent CPADB (5 mg) was injected into the solution. The flask was sealed and stirred (0-1000 rpm) at 80 °C for 0-5 hours. The product was then centrifuged and washed with hexane for three times. The powder was then dried in a vacuum oven for 24 hours. Finally, the PMBA@CsPbBr<sub>3</sub> NPs were obtained.

### Detection of acid gases by PMBA@CsPbBr<sub>3</sub>

To investigate the sensing properties of PMBA@CsPbBr<sub>3</sub> NPs to acidic gas HCl or HBr, we designed a proof-of-concept experimental device. PMBA@CsPbBr<sub>3</sub> NPs was coated on the platform and equipped with an ultraviolet beam (365 nm) and fiber respectively to excite and record the PL emission from the sample. The gases (HCl and HBr) were controlled from the concentrated solution into a 10 L closed transparent container.

### Characterization

JEOL 7800F Field Emission Scanning Electron Microscope was used to test the SEM image. TEM and high-resolution TEM (HR-TEM) characterization are collected at 200 kV using a FEI G<sub>2</sub>F<sub>30</sub> electron microscope equipped with Gatan SC 200 CCD camera. The powder X-ray diffraction (PXRD) analysis of the obtained PMBA@CsPbBr<sub>3</sub> NPs was carried out by Bruker AXS D8 Discovery X-ray diffractometer at the wavelength of Cu K (1.97 Å). X-ray photoelectron spectroscopy

(XPS) was tested by AXIS ULTRA instrument (England, KRATOS ANALYTICAL, Ltd.), which is conducted using the Al mono K  $\alpha$  X-ray source (1486.6 eV) at 150 W with the acquisition times of 220 s for chemical element analysis. Ultraviolet and visible absorption (UV-vis) spectra were collected using a Cary 5000 UV-Vis-NIR spectrophotometer. Fluorescence spectra and absolute PLQYs were collected using an integrated sphere on an Edinburgh Instruments FLS920 spectrophotometer.

### **Stabilities**

For environmental stability test, PMBA@CsPbBr<sub>3</sub> NPs were conducted by placing them under atmosphere over time, of which PL intensities were recorded. For photostability stability test, the PMBA@CsPbBr<sub>3</sub> NPs were exposed to UV light irradiation (365 nm, 0.5 W·cm<sup>-2</sup>) at room temperature, before being subjected to further characterization.

## Supplementary Figures

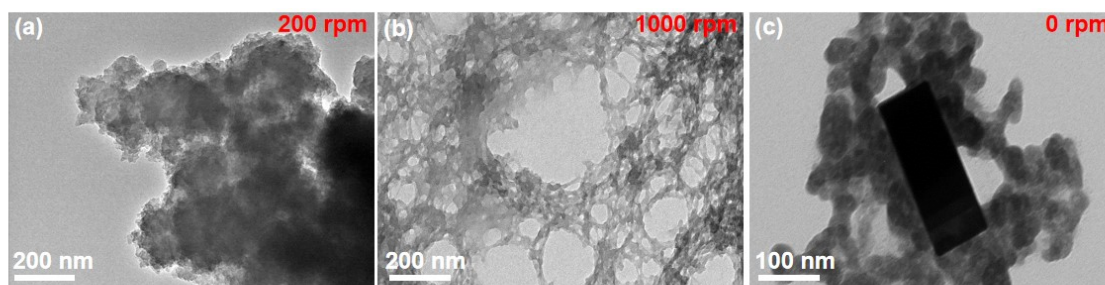

**Fig. S1** TEM images of the PMBA@CsPbBr<sub>3</sub> at the stirring speed of 200 rpm (a), 1000 rpm (b) and 0 (without stirring) (c), respectively.

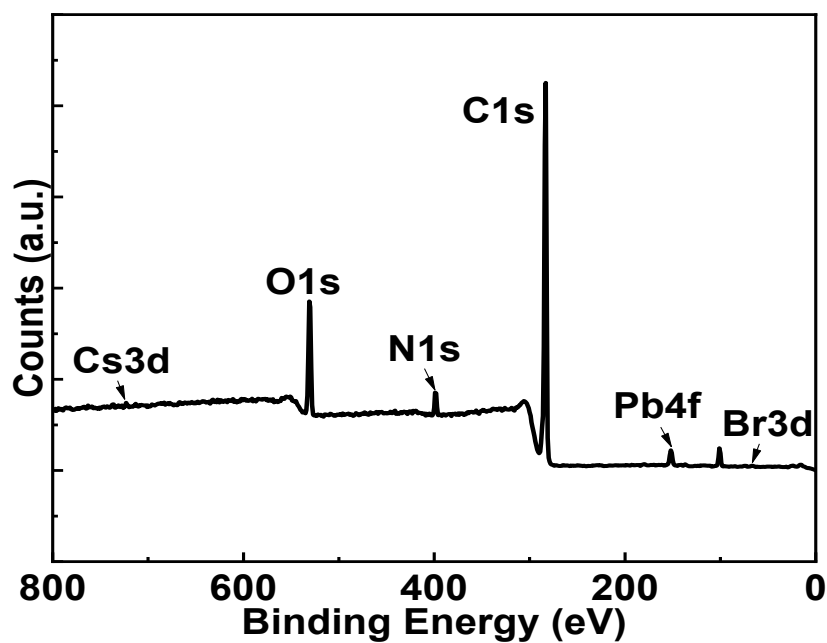

**Fig. S2** XPS scanning of the PMBA@CsPbBr<sub>3</sub> NPs.

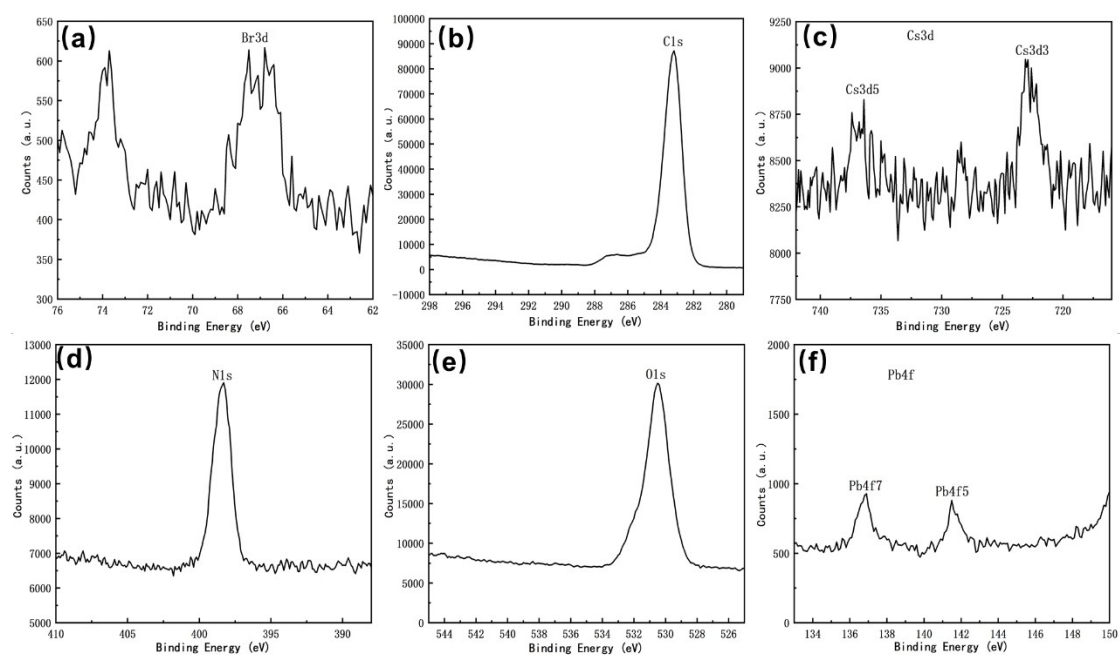

**Fig. S3** (a-f) High resolution X-ray photoelectron spectroscopy (XPS) of Br3d, C1s, Cs3d, N1s, O1s and Pb4f of PMBA@CsPbBr<sub>3</sub> NPs.

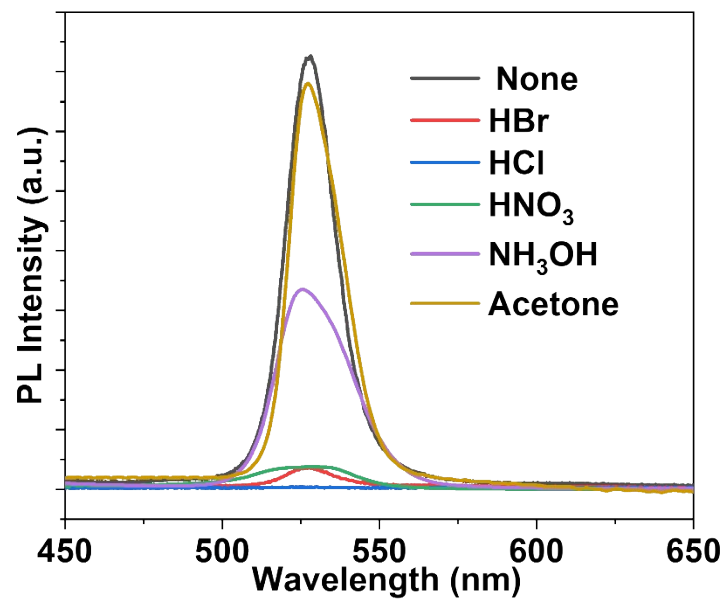

**Fig. S4** PL spectra of the PMBA@CsPbBr<sub>3</sub> NPs exposed to various volatiles.

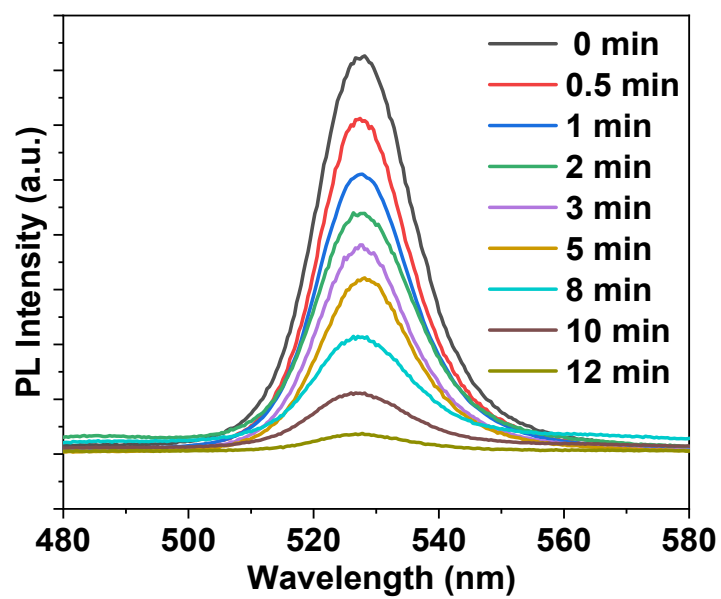

**Fig. S5** PL spectra of the PMBA@CsPbBr<sub>3</sub> NPs in HBr atmosphere for different times.

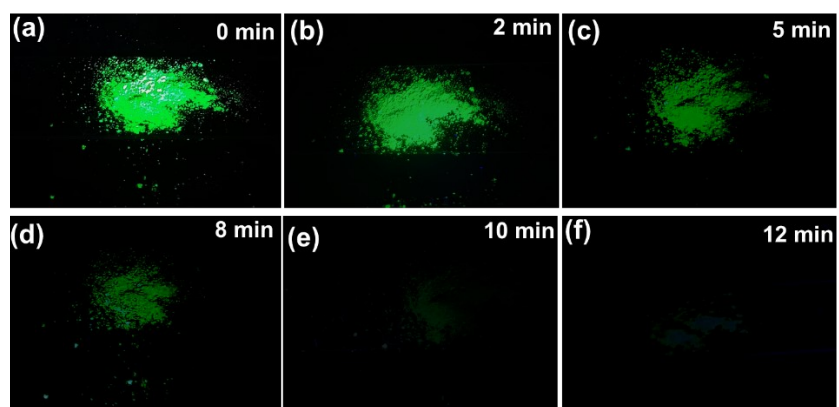

**Fig. S6** The photographs of PMBA@CsPbBr<sub>3</sub> NPs for sensing HBr over times.

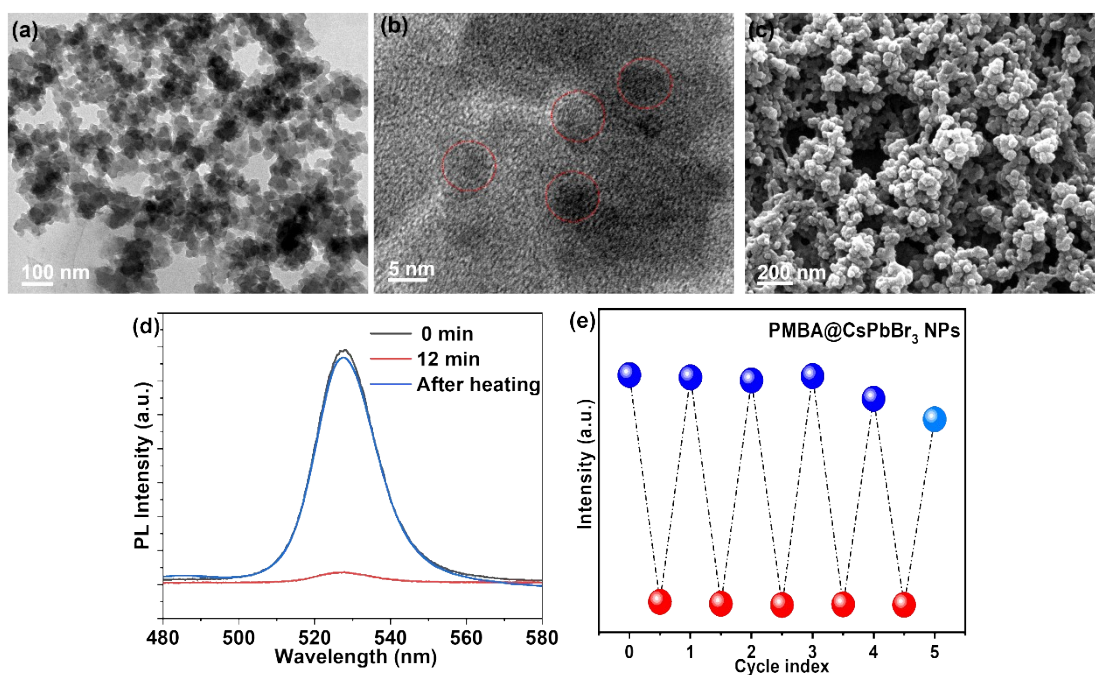

**Fig. S7** TEM (a), HR-TEM (b) and SEM (c) of PMBA@CsPbBr<sub>3</sub> NPs after three sensing cycles. (d) PL spectra of PMBA@CsPbBr<sub>3</sub> NPs at 0, 12 min with HBr gas and heating for 30 min. (e) Cycling tests of PMBA@CsPbBr<sub>3</sub> NPs over different sensing.

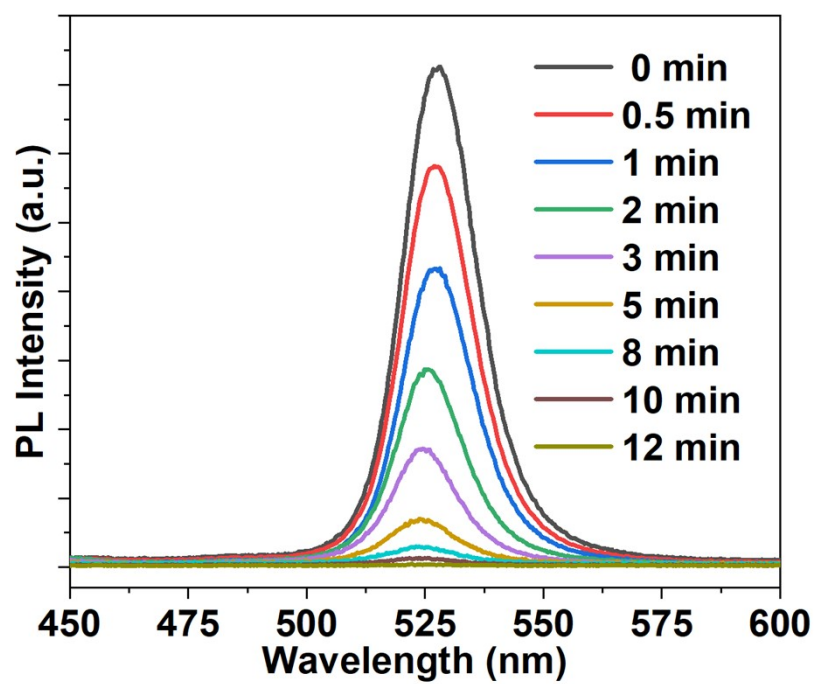

**Fig. S8** PL spectra of PMBA@CsPbBr<sub>3</sub> NPs in HCl atmosphere for different times.

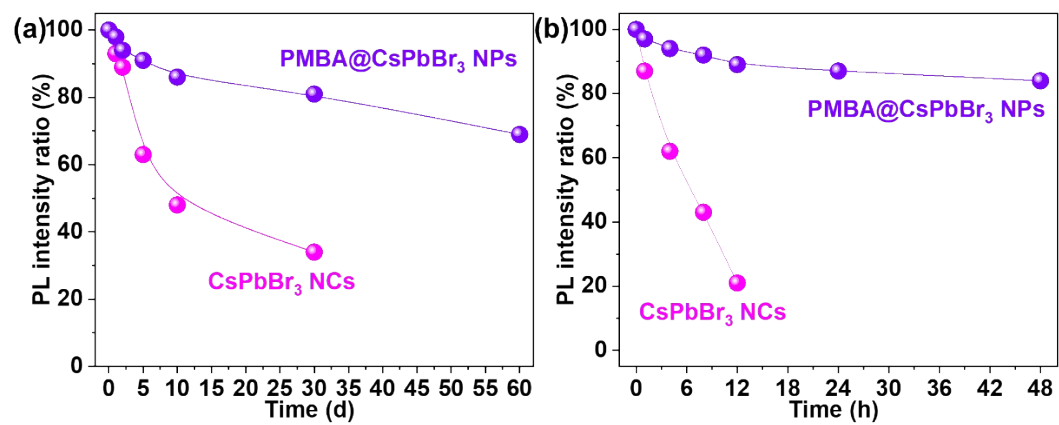

**Fig. S9** PL intensities of CsPbBr<sub>3</sub> NCs and PMBA@CsPbBr<sub>3</sub> NPs under air (a) and UV (365 nm) irradiation (b) over time.
